# Supplementary material for: SARS-CoV-2 infection in pediatric population before and during the Delta (B.1.617.2) and Omicron (B.1.1.529) variants era
Source: Springer Nature journal article supplement (doi:10.1186/s12985-022-01873-4), 2022-09-08
Supplement: MOESM1 [file 23468074]

**Table 1:** General information about the included studies and their references

| <b>Authors/<br/>Reference</b>                 | <b>Date of<br/>investigations</b>     | <b>Town/Country</b> | <b>Population</b>                          | <b>Main Idea</b>                                                                                                                                        |
|-----------------------------------------------|---------------------------------------|---------------------|--------------------------------------------|---------------------------------------------------------------------------------------------------------------------------------------------------------|
| <b>Laxminarayan<br/>R et al [1]</b>           | March – July<br>2020                  | Indian states       | 575,071 individuals                        | Epidemiology and<br>transmission dynamics<br>of COVID-19                                                                                                |
| <b>Rathore JS<br/>and Ghosh C<br/>[2]</b>     | March-May,<br>2020                    | India               | ND                                         | SARS-COV-2 origin and<br>classification                                                                                                                 |
| <b>Zhou P et al [3]</b>                       | December<br>2019-January<br>2020      | Wuhan, China        | 2,761 peoples                              | characteristics of SARS-<br>COV-2                                                                                                                       |
| <b>Zhu N et al [4]</b>                        | December<br>2019- January<br>2020     | China               | 4 respiratory samples                      | Detection and Isolation of<br>a Novel Coronavirus                                                                                                       |
| <b>Drosten C et al<br/>[5]</b>                | March 3 to 9,<br>2003                 | Germany             | 3: 1 patient and 2<br>contacts             | Isolation and<br>characterization of a novel<br>coronavirus                                                                                             |
| <b>Zaki AM et al<br/>[6]</b>                  | June 13, 2012                         | Saudi Arabia        | 1 sample                                   | Isolation of a novel<br>coronavirus from a man<br>with pneumonia                                                                                        |
| <b>World Health<br/>Organization<br/>[7]</b>  | March 11,<br>2020                     | In the World        | Global population                          | World Health<br>Organization (WHO)<br>announced COVID-19 as<br>a pandemic                                                                               |
| <b>World Health<br/>Organization<br/>[8]</b>  | February 25,<br>2022                  | In the World        | 430 257 564 confirmed<br>cases of COVID-19 | Number of confirmed<br>cases and deaths                                                                                                                 |
| <b>Huang C et al<br/>[9]</b>                  | Jan 2, 2020                           | Wuhan, China        | 41 patients                                | Clinical features of<br>patients infected with<br>2019 novel coronavirus                                                                                |
| <b>Wang H [10]</b>                            | January 12,<br>2020                   | China               | ND                                         | The genetic sequence,<br>origin, and diagnosis of<br>SARS-CoV-2                                                                                         |
| <b>Wassenaar T<br/>m. and Zou Y<br/>[11]</b>  | January-<br>February 2020             | China               | ND                                         | classification of<br>betacoronaviruses and<br>identification of<br>Traditional Chinese<br>Medicine as potential<br>origin of zoonotic<br>coronaviruses. |
| <b>Lotfi M and<br/>Rezaei N [12]</b>          | December<br>2019-March<br>2020        | Iran                | ND                                         | SARS-CoV-2: A<br>comprehensive review<br>from pathogenicity of the<br>virus to clinical<br>consequences                                                 |
| <b>Zhang T et al<br/>[13]</b>                 | February 3to<br>17, 2020              | Tianjin, China      | 3 infected children                        | Detectable SARS-CoV-2<br>viral RNA in feces of<br>three children during<br>recovery period of<br>COVID-19 pneumonia                                     |
| <b>World Health<br/>Organization<br/>[14]</b> | May 27, 2020                          | In the World        | Children under 18<br>years old             | Clinical management of<br>COVID-19: interim<br>guidance                                                                                                 |
| <b>Jahangir. M et<br/>al [15]</b>             | December 1,<br>2019- April 9,<br>2020 | In the World        | Pediatric population                       | Clinical manifestations<br>and outcomes of COVID-<br>19 in the pediatric<br>population                                                                  |

|                                                       |                                    |              |                                           |                                                                                                       |
|-------------------------------------------------------|------------------------------------|--------------|-------------------------------------------|-------------------------------------------------------------------------------------------------------|
| <b>Rezaei N [16]</b>                                  | April 4, 2020                      | Iran         | Children aged < 10 years                  | COVID-19 affects healthy pediatricians more than pediatric patients                                   |
| <b>Shen K et al [17]</b>                              | December 2019-January 2020         | China        | 28 children aged from 1 month to 17 years | Diagnosis, treatment, and prevention of 2019 novel coronavirus infection in children                  |
| <b>Gkoutzourelas A et al [18]</b>                     | December 2019- June 2020           | In the World | Infected children                         | Kawasaki Disease and COVID-19                                                                         |
| <b>The Public Health England [19]</b>                 | May,7 -April 22, 2021              | UK           | ND                                        | SARS-CoV-2 variants of concern and variants under investigation in England                            |
| <b>Torjesen I [20]</b>                                | May-June 2021                      | London, UK   | ND                                        | Covid-19: Delta variant is now UK's most dominant strain and spreading through schools                |
| <b>Sheikh A et al [21]</b>                            | May-June 2021                      | Scotland     | ND                                        | SARS-CoV-2 Delta VOC in Scotland: demographics, risk of hospital admission, and vaccine effectiveness |
| <b>O'Dowd A [22]</b>                                  | June 11-17, 2021                   | London, UK   | 58 830 infected patients                  | Covid-19: Cases of Delta variant rise by 79%, but rate of growth slows                                |
| <b>Torjesen I [23]</b>                                | May 2021 to 13 December 2021       | London, UK   | Infected children                         | Covid-19: Omicron variant is linked to steep rise in hospital admissions of very young children       |
| <b>Scientific Advisory Group for Emergencies [24]</b> | 6 January 2022                     | London, UK   | Children aged < 18 years                  | Child admissions and severity                                                                         |
| <b>Tian D et al [25]</b>                              | November – December 2021           | In the World | ND                                        | The emergence and epidemic characteristics of the highly mutated SARS-CoV-2 Omicron variant           |
| <b>Callaway E and Ledford H [26]</b>                  | November - December 2021           | South Africa | 8,561 cases                               | Omicron variant: How bad is Omicron?                                                                  |
| <b>McNiff S [27]</b>                                  | December 26, 2021- January 1, 2022 | US           | Children aged between 5 and 17 years      | Covid hospitalizations rising in kids too young for vaccine                                           |
| <b>Viana R et al [28]</b>                             | December 20, 2021                  | South Africa | ND                                        | Rapid epidemic expansion of the SARS-CoV-2 Omicron variant in southern Africa                         |
| <b>TSabouri S et al [29]</b>                          | February 26, 2020- June 10, 2020   | In the World | Children under 18 years old               | Risk Factors for Severity in Children with Coronavirus Disease 2019                                   |
| <b>Mannheim J et al [30]</b>                          | March 5-April 8, 2020              | Chicago, USA | 64 children aged under 17 years           | Characteristics of Hospitalized Pediatric Coronavirus Disease 2019 Cases                              |
| <b>Wu Z et al [31]</b>                                | February 2020                      | China        | 72 314 Cases                              | Characteristics of and Important Lessons from the Coronavirus Disease                                 |

|                                                     |                                 |                        |                              |                                                                                                                         |
|-----------------------------------------------------|---------------------------------|------------------------|------------------------------|-------------------------------------------------------------------------------------------------------------------------|
|                                                     |                                 |                        |                              | 2019 (COVID-19) outbreak in China: summary of a report of 72314 cases from the Chinese center                           |
| <b>CDC [32]</b>                                     | February 12- April 2, 2020      | United States          | 2,572 children               | Coronavirus Disease 2019 in Children                                                                                    |
| <b>Dong Y et al [33]</b>                            | January 16 - February 8, 2020   | China                  | 728 infected children        | Epidemiology of COVID-19 Among Children in China                                                                        |
| <b>CDC [34]</b>                                     | March-December 2020             | United States          | Children aged under 17 years | Infections among children: Covid-19                                                                                     |
| <b>Melissa Borrelli et al [35]</b>                  | January- November 2020          | Different countries    | Pediatric population         | Coronavirus Disease 2019 in Children                                                                                    |
| <b>Dong Y et al [36]</b>                            | January 16 - February 8, 2020   | China                  | 2135 pediatric patient       | Epidemiological characteristics of 2143 pediatric patients with 2019 coronavirus disease                                |
| <b>Bhuiyan MU et al [37]</b>                        | Until June 4, 2020              | In different countries | 1,214 Children under 5 years | Epidemiology of COVID-19 infection in young children under five years                                                   |
| <b>Pan A et al [38]</b>                             | December 8, 2019, March 8, 2020 | Wuhan, China           | 32 583 cases                 | Association of Public Health Interventions with the Epidemiology of the COVID-19 Outbreak                               |
| <b>Public Health Agency of Canada COVID-19 [39]</b> | January 15- July 9, 2020        | Canada                 | 106,804 cases                | Descriptive epidemiology of deceased cases of COVID-19 reported during the initial wave of the epidemic                 |
| <b>Elimian KO et al [40]</b>                        | February 27 – June 6, 2020      | Nigeria                | 40 926 cases                 | Descriptive epidemiology of coronavirus disease 2019                                                                    |
| <b>Pollán M et al [41]</b>                          | April 27 - May 11, 202          | Spain                  | 61 075 participants          | Prevalence of SARS-CoV-2 in Spain (ENE-COVID): a nationwide, population-based seroepidemiological study                 |
| <b>Leidman E et al [42]</b>                         | March 1– December 12, 2020      | United States          | Children aged under 17 years | COVID-19 Trends Among Persons Aged 0-24 Years                                                                           |
| <b>Alahmari AA et al [43]</b>                       | June 20, 2020                   | Saudi Arabia           | 240,474 patients             | Epidemiological and clinical features of COVID-19 patients                                                              |
| <b>Nachege et al [44]</b>                           | March 10- July 31, 2020 2       | Congo, south Africa    | 766 confirmed COVID-19 cases | Clinical Characteristics and Outcomes of Patients Hospitalized for COVID-19 in Africa                                   |
| <b>Poustchi H et al [45]</b>                        | April 17- June 2, 2020          | Iran                   | 9181 individuals             | SARS-CoV-2 antibody seroprevalence in the general population and high-risk occupational groups across 18 cities in Iran |
| <b>Jakhmola S et al [46]</b>                        | March-April, 2020               | Different countries    | ND                           | A comparative analysis of COVID-19 outbreaks on age groups and both the                                                 |

|                                                         |                                      |                         |                                    |                                                                                                                                                     |
|---------------------------------------------------------|--------------------------------------|-------------------------|------------------------------------|-----------------------------------------------------------------------------------------------------------------------------------------------------|
|                                                         |                                      |                         |                                    | sexes of population from India and other countries                                                                                                  |
| <b>Korea Disease Control and Prevention Agency [47]</b> | April 4, 2020                        | Korea                   | 10,265 confirmed cases of COVID-19 | Weekly report on the COVID-19 situation in the Republic of Korea                                                                                    |
| <b>Jeng MJ et al [48]</b>                               | April 6, 2020                        | Taiwan                  | 12 Children                        | Coronavirus disease 2019 in children                                                                                                                |
| <b>Sola AM et al [49]</b>                               | April- May 2020                      | United states           | 28 children                        | Prevalence of SARS-CoV-2 Infection in Children Without Symptoms of Coronavirus Disease 2019                                                         |
| <b>World Health Organization [50]</b>                   | January 17-23 2022                   | Six WHO regions         | 21 million new cases               | COVID-19 weekly epidemiological update                                                                                                              |
| <b>National Association of Head Teachers [51]</b>       | 27 May 2021                          | UK                      | ND                                 | Data on covid-19 variant cases linked to schools                                                                                                    |
| <b>Office for National Statistics [52]</b>              | May 29, 2021                         | UK                      | Children aged above 2 years        | Coronavirus (COVID-19) Infection Survey                                                                                                             |
| <b>Dougherty K et al [53]</b>                           | April-May 2021                       | Oklahoma, United states | Children aged above 2 years        | SARS-CoV-2 B.1.617.2 (Delta) Variant COVID-19 Outbreak Associated with a Gymnastics Facility                                                        |
| <b>Shoji K et al [54]</b>                               | October 2020- May 2021               | Japan                   | Patients < 18 years                | Comparison of the clinical characteristics and outcomes of COVID-19 in children before and after the emergence of Delta variant of concern in Japan |
| <b>Edward PR et al [55]</b>                             | October 15th, 2020-August 31st, 2021 | USA                     | Patients < 18 years                | Severity of Illness Caused by Severe Acute Respiratory Syndrome Coronavirus 2 Variants of Concern in Children                                       |
| <b>Ryu BH et al [56]</b>                                | December 2020- August 2021           | South Korea             | 235 patients                       | Features of COVID-19 Among Children and Adolescents Without Risk Factors Before and After the Delta Variant Outbreak                                |
| <b>Siegel DA et al [57]</b>                             | August 2020– August 2021             | United states           | Children aged <17 years            | Trends in COVID-19 cases, emergency department visits, and hospital admissions among children and adolescents aged 0-17 years                       |
| <b>Wolter N et al [58]</b>                              | October 1 - December 6 2021          | South Africa            | 161 328 cases of COVID-19          | Early assessment of the clinical severity of the SARS-CoV-2 Omicron variant in South Africa.                                                        |
| <b>Sheikh A et al [59]</b>                              | November 1– December 19, 2021        | Scotland, UK            | 23 840 cases                       | Severity of Omicron variant of concern and vaccine effectiveness                                                                                    |

|                                                                     |                                |                      |                                        |                                                                                                                                               |
|---------------------------------------------------------------------|--------------------------------|----------------------|----------------------------------------|-----------------------------------------------------------------------------------------------------------------------------------------------|
|                                                                     |                                |                      |                                        | against symptomatic disease: national cohort with nested test negative design study in Scotland                                               |
| <b>WHO - MRC Centre for Global Infectious Disease Analysis [60]</b> | 1st and 14th December 2021     | England, UK          | ND                                     | Hospitalisation risk for Omicron cases in England                                                                                             |
| <b>Wang L et al [61]</b>                                            | September 1- December 21, 2021 | USA                  | 577,938 cases                          | Comparison of outcomes from COVID infection in pediatric and adult patients before and after the emergence of Omicron.                        |
| <b>Lee B and Raszka WV Jr [62]</b>                                  | March 10 - April 10, 2020      | Geneva               | Children <16 years                     | COVID-19 Transmission and Children: The Child Is Not to Blame                                                                                 |
| <b>Maltezou HC et al [63]</b>                                       | February 26- May 3 2020        | Greece               | 43 children                            | Transmission dynamics of SARS-CoV-2 within families with children in Greece                                                                   |
| <b>Laws RL et al [64]</b>                                           | March – May 2020               | United states        | 68 children < 18 years                 | Symptoms and Transmission of SARS-CoV-2 Among Children                                                                                        |
| <b>Kitano T et al [65]</b>                                          | December 2020                  | In the World         | 3,788 global pediatric COVID-19 deaths | The differential impact of pediatric COVID-19 between high-income countries and low- and middle-income countries                              |
| <b>Pascarella S et al [66]</b>                                      | May 2021                       | Italy                | ND                                     | SARS-CoV-2 B.1.617 Indian variants: Are electrostatic potential changes responsible for a higher transmission rate?                           |
| <b>Loenenbach A et al [67]</b>                                      | January– February 2021         | Hesse, Germany       | 3 Child care centres                   | SARS-CoV-2 variant B.1.1.7 susceptibility and infectiousness of children and adults deduced from investigations of childcare centre outbreaks |
| <b>Singh J et al [68]</b>                                           | January-April, 2021            | India                | ND                                     | SARS-CoV-2 variants of concern are emerging in India.                                                                                         |
| <b>Callaway E [69]</b>                                              | May-June 2021                  | UK, US, South Africa |                                        | Delta coronavirus variant: scientists brace for impact                                                                                        |
| <b>Schmidt F et al [70]</b>                                         | July 2021                      | USA                  | ND                                     | High genetic barrier to SARS-CoV-2 polyclonal neutralizing antibody escape                                                                    |
| <b>CDC [71]</b>                                                     | 2021 Dec 23                    | United states        | ND                                     | COVID Data Tracker                                                                                                                            |
| <b>Shen Q et al [72]</b>                                            | January 8 - February 19, 2020  | China                | 6 Children                             | Novel coronavirus infection in children outside of Wuhan, China                                                                               |
| <b>Han Y et al [73]</b>                                             | January 31- February 16, 2020  | China                | 32 cases                               | A comparative-descriptive analysis of clinical characteristics in 2019-coronavirus-infected children and adults                               |

|                            |                                      |                         |                                 |                                                                                                                                                           |
|----------------------------|--------------------------------------|-------------------------|---------------------------------|-----------------------------------------------------------------------------------------------------------------------------------------------------------|
| <b>Ogata T et al [74]</b>  | August-September, 2020               | Japan                   | 214 patients                    | Shorter Incubation Period among Unvaccinated Delta Variant Coronavirus Disease 2019 Patients in Japan                                                     |
| <b>Wang Y et al [75]</b>   | May 21 and June 18, 2021             | China                   | 159 cases                       | Transmission, viral kinetics and clinical characteristics of the emergent SARS-CoV-2 Delta VOC in Guangzhou, China                                        |
| <b>Zhang M et al [76]</b>  | May–June 2021                        | China                   | 167 cases                       | Transmission Dynamics of an Outbreak of the COVID-19 Delta Variant B.1.617.2 - Guangdong Province, China                                                  |
| <b>Li L et al [77]</b>     | May - June 2021.                     | China                   | ND                              | Transmission and containment of the SARS-CoV-2 Delta variant of concern in Guangzhou, China:                                                              |
| <b>Jansen L et al [78]</b> | November-December, 2021              | Nebraska, Unites states | 1 patient                       | Investigation of a SARS-CoV-2 B.1.1.529 (Omicron) variant cluster                                                                                         |
| <b>Su L et al [79]</b>     | January 24, 2020 - February 24, 2020 | China                   | 9 children                      | The different clinical characteristics of corona virus disease cases between children and their families in China—the character of children with COVID-19 |
| <b>Feng K et al [80]</b>   | January 16 February 6, 2020          | China                   | 15 children                     | Analysis of CT features of 15 children with 2019 novel coronavirus infection                                                                              |
| <b>Ma X et al [81]</b>     | January-March 2020                   | China                   | 6 children                      | Do children need a longer time to shed SARS-CoV-2 in stool than adults?                                                                                   |
| <b>Hu Z et al [82]</b>     | January 28 - February 9, 2020        | China                   | 24 cases                        | Clinical characteristics of 24 asymptomatic infections with COVID-19 screened among close contacts in Nanjing, China                                      |
| <b>Li W et al [83]</b>     | January 28-February 8, 2020          | China                   | 5 children                      | Chest computed tomography in children with COVID-19 respiratory infection                                                                                 |
| <b>Yang P et al [84]</b>   | January – February 2020              | China                   | 416 children Under 10 years old | Corona Virus Disease 2019, a growing threat to children?                                                                                                  |
| <b>Yu N et al [85]</b>     | January 1 - February 8, 2020         | China                   | 7 patients                      | Clinical features and obstetric and neonatal outcomes of pregnant patients with COVID-19 in Wuhan, China                                                  |
| <b>Qiu H et al [86]</b>    | January 17 - March 1, 2020           | Zhejiang, China         | 36 children                     | Clinical and epidemiological features of 36 children with coronavirus disease 2019                                                                        |

|                                 |                                     |                                 |                                           |                                                                                                                                        |
|---------------------------------|-------------------------------------|---------------------------------|-------------------------------------------|----------------------------------------------------------------------------------------------------------------------------------------|
|                                 |                                     |                                 |                                           | (COVID-19) in Zhejiang, China                                                                                                          |
| <b>Zheng F et al [87]</b>       | February 2020                       | China                           | 25 pediatric cases                        | Clinical Characteristics of Children with Coronavirus Disease 2019 in Hubei, China                                                     |
| <b>Jeng M-J [88]</b>            | March – April 2020                  | Taiwan                          | Children younger than 20 years of age     | Coronavirus disease 2019 in children                                                                                                   |
| <b>Xia W et al [89]</b>         | January 23-February 8, 2020         | China                           | 20 pediatric cases                        | Clinical and CT features in pediatric patients with COVID-19 infection: different points from adults                                   |
| <b>Wang D et al [90]</b>        | January 25-February 21, 2020        | China                           | 31 children                               | Clinical analysis of 31 cases of 2019 novel coronavirus infection in children from six provinces (autonomous region) of northern China |
| <b>Wei M et al [91]</b>         | December 8, 2019 - February 6, 2020 | China                           | 9 infants                                 | Novel coronavirus infection in hospitalized infants under 1 year of age in China                                                       |
| <b>Liu W et al [92]</b>         | January 7 - January 15, 2020        | China                           | 366 hospitalized children                 | Detection of COVID-19 in children in early January 2020 Wuhan, China                                                                   |
| <b>Lu X et al [93]</b>          | January 28 - February 26, 2020      | China                           | 1391 children                             | SARS-CoV-2 Infection in Children                                                                                                       |
| <b>Parri N and Lenge M [94]</b> | March 3 - March 27, 2020            | Italy                           | 100 children younger than 18 years of age | Children with Covid-19 in Pediatric Emergency Departments in Italy                                                                     |
| <b>Sun D et al [95]</b>         | January 24 - February 24, 2020      | China                           | 8 children                                | Clinical features of severe pediatric patients with coronavirus disease 2019 in Wuhan                                                  |
| <b>Zhou Y et al [96]</b>        | January 20-February 10, 2020        | China                           | 9 children, aged Under 3 years            | Clinical features and chest CT findings of coronavirus disease 2019 in infants and young children                                      |
| <b>Al-Beltagi M et al [97]</b>  | April, 2021                         | In different countries          | Children aged under 18 years              | Pediatric gastrointestinal disorders in SARS-CoV-2 infection: Epidemiological and clinical implications                                |
| <b>Han YN et al [98]</b>        | 1st January - 16th February, 2020   | China                           | 7 children                                | A comparative-descriptive analysis of clinical characteristics in 2019-coronavirusinfected children and adults                         |
| <b>Aguila EJT et al [99]</b>    | December – February, 2020           | China, Hong Kong, and Singapore | 2645 patients                             | COVID-19 and its effects on the digestive system and endoscopy practice                                                                |
| <b>Jin X et al [100]</b>        | January 17-February 8, 2020         | Zhejiang, China                 | 74 patients                               | Epidemiological, clinical and virological characteristics of 74 cases of coronavirus-infected disease 2019 (COVID-19)                  |

|                               |                                      |                  |                                          |                                                                                                                                  |
|-------------------------------|--------------------------------------|------------------|------------------------------------------|----------------------------------------------------------------------------------------------------------------------------------|
|                               |                                      |                  |                                          | with gastrointestinal symptoms.                                                                                                  |
| <b>Jahangir M et al [101]</b> | December 1, 2019 - April 9, 2020     | China, US        | pediatric population aged under 19 years | Clinical manifestations and outcomes of COVID-19 in the pediatric population                                                     |
| <b>Pan L et al [102]</b>      | January 18, 2020 - March 18, 2020    | Hubei, China     | 204 Patients                             | Clinical characteristics of COVID-19 patients with digestive symptoms in Hubei, China                                            |
| <b>Cheung KS et al [103]</b>  | February 2 - February 29, 2020       | Hong Kong, China | 59 patients                              | Gastrointestinal manifestations of SARS-CoV-2 infection and virus load in fecal samples from the Hong Kong                       |
| <b>Yang X et al [104]</b>     | December, 2019-February 9 2020       | Wuhan, China     | 52 patients                              | Clinical course and outcomes of critically ill patients with SARS-CoV-2 pneumonia in Wuhan, China                                |
| <b>Chen N et al [105]</b>     | January 1-25, 2020                   | Wuhan, China     | 99 patients                              | Epidemiological and clinical characteristics of 99 cases of 2019 novel coronavirus pneumonia in Wuhan, China                     |
| <b>Wang Y et al [106]</b>     | January 11, 2020 - February 29, 2020 | Shenzhen, China  | 55 Patients                              | Clinical outcome of 55 asymptomatic cases at the time of hospital admission infected with SARS-Coronavirus-2 in Shenzhen, China  |
| <b>Xu X et al [107]</b>       | January 10, 2020 – January, 26 2020  | Zhejiang China   | 62 patients                              | Clinical findings in a group of patients infected with the 2019 novel coronavirus (SARS-Cov-2) outside of Wuhan, China           |
| <b>Guan W et al [108]</b>     | January 2020                         | China            | 1099 patients                            | Clinical characteristics of coronavirus disease 2019 in China                                                                    |
| <b>Young B et al [109]</b>    | January 23 - February 3, 2020        | Singapore        | 18 patients                              | Epidemiologic features and clinical course of patients infected with SARS-CoV-2 in Singapore                                     |
| <b>Han C et al [110]</b>      | February 13 - February 29, 2020      | China            | 206 patients                             | Digestive symptoms in COVID-19 patients with mild disease severity: Clinical presentation, stool viral RNA testing, and outcomes |
| <b>Giacomet V et al [111]</b> | February 21 - May 1, 2020            | Italy            | 127 children                             | Gastrointestinal Symptoms in Severe COVID-19 Children                                                                            |
| <b>Hu Z et al [112]</b>       | April 2020- August 2021              | Wuhan, China     | 677 patients                             | Differences in Clinical Characteristics Between Delta Variant and Wild-Type SARS-CoV-2 Infected Patients                         |



|                                                |                                                             |                 |                                |                                                                                                                                          |
|------------------------------------------------|-------------------------------------------------------------|-----------------|--------------------------------|------------------------------------------------------------------------------------------------------------------------------------------|
| <b>Italian National Health Institute [113]</b> | March 26, 2020                                              | Italy           | ND                             | Coronavirus epidemic: situation report                                                                                                   |
| <b>Tagarro A et al [114]</b>                   | March 2 -16, 2020                                           | Madrid, Spain   | 365 children                   | Screening and severity of coronavirus disease 2019 (COVID-19) in Children in Madrid, Spain                                               |
| <b>Mahase E [115]</b>                          | May-June 2021                                               | UK              | ND                             | . Delta variant: What is happening with transmission, hospital admissions, and restrictions?                                             |
| <b>B.-H. Ryu et al [116]</b>                   | December 2020 to August 2021                                | South Korea     | 235 patients                   | Features of COVID-19 Among Children and Adolescents Without Risk Factors Before and After the Delta Variant Outbreak in South Korea      |
| <b>Wang L et al [117]</b>                      | December 26, 2021- January 6, 2022                          | United states   | 7,201 infected children        | COVID infection severity in children under 5 years old before and after Omicron emergence in the US                                      |
| <b>Sheikh A et al [118]</b>                    | April 1 to June 6, 2021                                     | UK              | 19 543 confirmed SARS-CoV-2    | SARS-CoV-2 Delta VOC in Scotland: demographics, risk of hospital admission, and vaccine effectiveness.                                   |
| <b>Twohig KA et al [119]</b>                   | March 29 - May 23, 2021                                     | UK              | 49 930 cases                   | Hospital admission and emergency care attendance risk for SARS-CoV-2 Delta (B.1.617.2) compared with alpha (B.1.1.7) variants of concern |
| <b>Murillo-Zamora E et al [120]</b>            | March 2020- July 2021                                       | Mexico, America | Children aged < 10 years       | Decreased risk of COVID-19 pneumonia in children and adolescents during the Delta variant emergence                                      |
| <b>Delahoy MJ et al [121]</b>                  | March 1, 2020–August 14, 2021                               | United states   | Children aged under 17 years   | Hospitalizations associated with COVID-19 among children and adolescents                                                                 |
| <b>Cheng QR et al [122]</b>                    | January 25 - February 21, 2020<br>July 22 - August 20, 2021 | China           | 23 children<br><br>66 children | Chest CT features of children infected by B.1.617.2 (Delta) variant of COVID-19.                                                         |
| <b>Brough HA et al [123]</b>                   | January 16 - February 8, 2020                               | China           | 2143 pediatric patients        | Managing childhood allergies and immunodeficiencies during respiratory virus epidemics - the 2020 COVID-19 pandemic.                     |
| <b>Al Yazidi LS et al [124]</b>                | 2020 - 2021                                                 | Oman            | 140 patients                   | COVID-19 AND PRIMARY IMMUNODEFICIENCY                                                                                                    |

|                                |                           |                        |                             |                                                                                                                                     |
|--------------------------------|---------------------------|------------------------|-----------------------------|-------------------------------------------------------------------------------------------------------------------------------------|
| <b>Ahanchian H et al [125]</b> | March- April 2020         | Iran                   | 1 patient                   | COVID-19 in a Child with Primary Specific Antibody Deficiency                                                                       |
| <b>CDC [126]</b>               | April 2, 2020             | United states          | ND                          | Coronavirus Disease 2019 (COVID-19).                                                                                                |
| <b>Liu BM et al [127]</b>      | December 2020             | USA                    | ND                          | Role of Host Immune and Inflammatory Responses in COVID-19 Cases with Underlying Primary Immunodeficiency                           |
| <b>Babaha F et al [128]</b>    | July 2020                 | Italy                  | 9 Cases                     | Primary Immunodeficiency Diseases in COVID-19 Pandemic: A Predisposing or Protective Factor?                                        |
| <b>Delavari S et al [129]</b>  | December 2020             | Iran                   | Children aged than 14 years | Impact of SARS-CoV-2 Pandemic on Patients with Primary Immunodeficiency                                                             |
| <b>Meyts I et al [130]</b>     | March 16 - June 30, 2020  | An international study | 94 patients                 | Coronavirus disease 2019 in patients with inborn errors of immunity                                                                 |
| <b>Shields AM et al [131]</b>  | March – July, 2020        | UK                     | 100 patients                | COVID-19 in patients with primary and secondary immunodeficiency                                                                    |
| <b>Quinti I et al [132]</b>    | 2020 Apr 22               | Italy                  | 7 patients                  | A possible role for B cells in COVID-19? Lesson from patients with agammaglobulinemia                                               |
| <b>Soresina A et al [133]</b>  | During 2020               | Northern Italy         | 2 patients                  | Two X-linked agammaglobulinemia patients develop pneumonia as COVID-19 manifestation but recover                                    |
| <b>Kew OM et al [134]</b>      | Sep 13, 2005              | United states          | ND                          | Vaccine-derived polioviruses and the endgame strategy for global polio                                                              |
| <b>Driss N et al [135]</b>     | March 2006- August 2010   | Tunis                  | 82 patients                 | High susceptibility for enterovirus infection and virus excretion features in Tunisian patients with primary immunodeficiencies     |
| <b>Driss N et al [136]</b>     | October 2009 - April 2013 | Tunis                  | 1 patient                   | Sequential asymptomatic enterovirus infections in a patient with major histocompatibility complex class II primary immunodeficiency |

|                                   |                          |                                     |                           |                                                                                                                                           |
|-----------------------------------|--------------------------|-------------------------------------|---------------------------|-------------------------------------------------------------------------------------------------------------------------------------------|
| <b>Lamari A et al [137]</b>       | November 2013, July 2014 | Tunis                               | 35 samples from 1 patient | Iterative Excretion of Human Cosaviruses from Different Genotypes                                                                         |
| <b>Avanzato VA et al [138]</b>    | February- July 2020      | USA                                 | 1 patient                 | Case Study: Prolonged Infectious SARS-CoV-2 Shedding from an Asymptomatic Immunocompromised Individual with Cancer                        |
| <b>Tarhini H et al [139]</b>      | April 2020 – June 2020   | Africa, Tunisia, European countries | 3 patients                | Long term SARS-CoV-2 infectiousness among three immunocompromised patients: from prolonged viral shedding to SARS-CoV-2 superinfection    |
| <b>Hadjadj J et al [140]</b>      | January - April 2021     | France                              | 77 cases                  | Immunogenicity of BNT162b2 vaccine against the Alpha and Delta variants in immunocompromised patients with systemic inflammatory diseases |
| <b>Chappell H et al [141]</b>     | March 2020 - 2021        | UK                                  | 1527 participants         | Immunocompromised children and young people are at no increased risk of severe COVID-19                                                   |
| <b>WHO [142]</b>                  | 26 November 2021         | South Africa                        | ND                        | Classification of Omicron (B.1.1.529): SARS-CoV-2 Variant of Concern                                                                      |
| <b>CDC [143]</b>                  | Mar. 29, 2022            | United states                       | ND                        | Omicron Variant                                                                                                                           |
| <b>Wang L and Cheng G [144]</b>   | November - December 2021 | In the World                        | ND                        | Sequence analysis of the emerging SARS-CoV-2 variant Omicron in South Africa                                                              |
| <b>Bansal N et al [145]</b>       | 2021-2022                | India                               | ND                        | SARS-CoV-2 variants in immunocompromised COVID-19 patients: The underlying causes and the way forward                                     |
| <b>Gao S-J et al [146]</b>        | Since November 2021      | In the world                        | ND                        | Omicron variant (B.1.1.529) of SARS-CoV-2, a global urgent public health alert!                                                           |
| <b>Singhal T [147]</b>            | November, December, 2021 | India                               | ND                        | The Emergence of Omicron: Challenging Times Are Here Again                                                                                |
| <b>Fang et al [148]</b>           | Until October 2020       | In different countries              | ND                        | Kawasaki like Illness Due to COVID-19                                                                                                     |
| <b>Ozen S et al [149]</b>         | June 2005                | Different countries                 | ND                        | EULAR/PReS endorsed consensus criteria for the classification of childhood vasculitides                                                   |
| <b>B.W. McCrindle et al [150]</b> | 2011- 2017               | In different countries              | ND                        | Diagnosis, Treatment, and long-term management of Kawasaki disease: a scientific statement for health professionals from                  |

|                                      |                                  |                                     |                             |                                                                                                                                                        |
|--------------------------------------|----------------------------------|-------------------------------------|-----------------------------|--------------------------------------------------------------------------------------------------------------------------------------------------------|
|                                      |                                  |                                     |                             | the American heart association                                                                                                                         |
| <b>Kawasaki T et al [151]</b>        | In 1974                          | Japan                               | ND                          | A new infantile acute febrile mucocutaneous lymph node syndrome (MLNS) prevailing in Japan                                                             |
| <b>Kato H et al [152]</b>            | 1973 - 1983                      | Japan                               | 594 children                | Long-term consequences of Kawasaki disease. A 10- to 21-year follow-up study of 594 patients                                                           |
| <b>Xu S et al [153]</b>              | May 2020                         | China, UK, USA, Italy               | ND                          | COVID-19 and Kawasaki disease in children                                                                                                              |
| <b>Kanegaye JT et al [154]</b>       | January 2001 - August 2006       | United states                       | 373 patients                | Recognition of a Kawasaki disease shock syndrome                                                                                                       |
| <b>Dietz SM et al [155]</b>          | 2017                             | In different countries              | Children under 5 years      | Dissecting Kawasaki disease                                                                                                                            |
| <b>McCrindle BW et al [156]</b>      | 2017                             | North America, Asia                 | ND                          | Diagnosis, treatment, and long-term management of Kawasaki disease                                                                                     |
| <b>L. Verdoni et al [157]</b>        | January 1, 2015 - April 20, 2020 | Italy                               | 29 patients                 | An outbreak of severe Kawasaki-like disease at the Italian epicenter of the SARS-CoV-2 epidemic                                                        |
| <b>Saguil A et al [158]</b>          | November 2013 - September 2014   | United States                       | ND                          | Diagnosis and management of Kawasaki disease                                                                                                           |
| <b>Kabeerdoss J et al [159]</b>      | December 1, 2019—August 31, 2020 | In different countries              | Children aged below 3 years | Severe COVID-19, multisystem inflammatory syndrome in children, and Kawasaki disease: immunological mechanisms, clinical manifestations and management |
| <b>Toubiana J et al [160]</b>        | April 27 - May 15, 2020          | France                              | 21 children and adolescent  | Kawasaki-like multisystem inflammatory syndrome in children during the covid-19 pandemic in Paris, France: prospective observational study             |
| <b>Jones VG et al [161]</b>          | January 2020                     | California, United states           | 1 child                     | COVID-19 and Kawasaki disease: novel virus and novel case                                                                                              |
| <b>Rivera-Figueroa E et al [162]</b> | May 2020                         | USA                                 | 1 patient                   | Incomplete Kawasaki disease in a child with COVID-19                                                                                                   |
| <b>Pouletty M et al [163]</b>        | Since April 2020                 | Paris, France                       | 16 patients                 | Pediatric multisystem inflammatory syndrome temporally associated with SARS-CoV-2 mimicking Kawasaki disease (Kawa-COVID-19)                           |
| <b>Ramcharan T et al [164]</b>       | April 10 - May 9, 2020           | African/Afro-Caribbean, South Asian | 15 children                 | Pediatric inflammatory multisystem syndrome: temporally associated                                                                                     |

|                                                         |                              |                                        |                                  |                                                                                                                                                               |
|---------------------------------------------------------|------------------------------|----------------------------------------|----------------------------------|---------------------------------------------------------------------------------------------------------------------------------------------------------------|
|                                                         |                              |                                        |                                  | with SARSCoV-2 (PIMS-TS)                                                                                                                                      |
| <b>Ouldali N et al [165]</b>                            | July 2020                    | Barcelona, Spain                       | 12 children                      | Response to: 'Correspondence on 'Pediatric multisystem inflammatory syndrome temporally associated with SARS-CoV-2 mimicking Kawasaki disease (Kawa-COVID-19) |
| <b>Lee PY et al [166]</b>                               | March - June 2020            | USA                                    | 28 patients                      | Distinct clinical and immunological features of SARS-COV-2-induced multisystem inflammatory syndrome in children                                              |
| <b>Pino R et al [167]</b>                               | March 23 - May 14, 2020      | Barcelona, Spain                       | Patients aged >12 years          | Correspondence on: 'Pediatric multisystem inflammatory syndrome temporally associated with SARS-CoV-2 mimicking Kawasaki disease (Kawa-COVID-19)              |
| <b>Jones VG et al [168]</b>                             | June 2020                    | California United states               | 1 patient                        | COVID-19 and Kawasaki disease: novel virus and novel case.                                                                                                    |
| <b>Thompson LA et al [169]</b>                          | June 2021                    | Florida, United states                 | Children aged 12 years and older | Return to Play After COVID-19 Infection in Children                                                                                                           |
| <b>Centers for Disease Control and Prevention [170]</b> | April 26, 2020               | UK                                     | 8 Cases                          | Emergency preparedness and response: multisystem inflammatory syndrome in children (MIS-C) associated with coronavirus disease 2019 (COVID-19)                |
| <b>Nakra N et al [171]</b>                              | February 18 - April 20, 2020 | UK, Italy, France, USA and Switzerland | 70 children                      | Multi-System Inflammatory Syndrome in Children (MIS-C) Following SARS-CoV-2 Infection                                                                         |
| <b>Riollano-Cruz M et al [172]</b>                      | 24 April 19 June 2020        | New York, US                           | 15 Patients                      | Multisystem Inflammatory Syndrome in Children (MIS-C) Related to COVID-19                                                                                     |
| <b>Feldstein LR et al [173]</b>                         | March 15 - May 20, 2020      | United states                          | Patients aged < 21 years         | Multisystem Inflammatory Syndrome in U.S. Children and Adolescents.                                                                                           |
| <b>Miller J et al [174]</b>                             | April 18 - May 22, 2020      | Columbia, South America                | 44 patients                      | Gastrointestinal symptoms as a major presentation component of a novel multisystem inflammatory syndrome in children (MIS-C) that is related to COVID-19      |
| <b>Chiotos K et al [175]</b>                            | April-May, 2020              | UK, USA                                | 6 Children                       | Multisystem Inflammatory Syndrome in Children During the                                                                                                      |

|                                        |                               |                        |                        | Coronavirus 2019<br>Pandemic                                                                                               |
|----------------------------------------|-------------------------------|------------------------|------------------------|----------------------------------------------------------------------------------------------------------------------------|
| <b>Grimaud M et al [176]</b>           | April 15 - April 27, 2020     | Paris, France          | 20 children            | Acute myocarditis and multisystem inflammatory emerging disease following SARS-CoV-2 infection in critically ill children. |
| <b>Belhadjer Z et al [177]</b>         | March 22 - April 30, 2020     | France and Switzerland | 35 children            | Acute heart failure in multisystem inflammatory syndrome in children (MIS-C) in the context of global SARS-CoV-2 pandemic  |
| <b>Christensen PA et al [178]</b>      | March 15 - September 20, 2021 | Houston, US            | 16,965 patients        | Delta Variants of SARS-CoV-2 Cause Significantly Increased Vaccine Breakthrough COVID-19 Cases in Houston, Texas           |
| <b>Oualha M et al [179]</b>            | February 10 - April 20, 2020  | Paris, France          | 27 Children            | Severe and fatal forms of COVID-19 in children                                                                             |
| <b>De Jacobis IT et al [180]</b>       | February - July 2020          | Rome, Italy            | 66 patients            | Clinical characteristics of children infected with SARS-CoV-2 in Italy                                                     |
| <b>Pecoraro L et al [181]</b>          | April 16, 2020                | Italy                  | 1123 children          | The psychophysical impact that COVID-19 has on children must not be underestimated                                         |
| <b>Hoffmann M et al [182]</b>          | Mar 5, 2020                   | Germany                | ND                     | SARS-CoV-2 cell entry depends on ACE2 and TMPRSS2 and is blocked by a clinically proven protease inhibitor                 |
| <b>Wang Q et al [183]</b>              | February 24, 2020             | China                  | 77,262 cases           | Structural and Functional Basis of SARS-CoV-2 Entry by Using Human ACE2                                                    |
| <b>Lee PI et al [184]</b>              | February 11, 2020             | Taiwan                 | 44,672 confirmed cases | Are children less susceptible to COVID-19?                                                                                 |
| <b>Be'ne'teau-Burnat B et al [185]</b> | 1990 February                 | France                 | 187 Children           | Serum angiotensin-converting enzyme in healthy and sarcoidotic children: comparison with the reference interval for adults |
| <b>Kunling Shen et al [186]</b>        | January 30, 2020              | China                  | 9692 confirmed cases   | Diagnosis, treatment, and prevention of 2019 novel coronavirus infection in children: experts' consensus statement.        |
| <b>Gold JE et al [187]</b>             | January 2020 - September 2020 | USA                    | 50 subjects            | Analysis of Measles-Mumps-Rubella (MMR) Titers of Recovered COVID-19 Patients                                              |
| <b>Escobar LE et al [188]</b>          | April 20, 2020                | United states          | ND                     | BCG vaccine protection from severe coronavirus disease 2019 (COVID-19)                                                     |

|                                      |                                      |                                    |                     |                                                                                                                                                                  |
|--------------------------------------|--------------------------------------|------------------------------------|---------------------|------------------------------------------------------------------------------------------------------------------------------------------------------------------|
| <b>Haddad-Boubaker S et al [189]</b> | December 8, 2019 - January 15, 2021  | Tunis                              | 14 similar segments | In silico comparative study of SARS-CoV-2 proteins and antigenic proteins in BCG, OPV, MMR and other vaccines: evidence of a possible putative protective effect |
| <b>Bandi S et al [190]</b>           | March 12 - April 20, 2020            | Chicago, United states             | 474 children        | African American children are at higher risk for COVID-19 infection                                                                                              |
| <b>DeBiasi RL et al [191]</b>        | March 15 - April 30, 2020            | Washington, United states          | 177 children        | Severe COVID-19 in children and young adults in the Washington                                                                                                   |
| <b>Whittaker E et al [192]</b>       | March 23 - May 16, 2020              | UK                                 | 58 children         | Clinical characteristics of 58 children with a pediatric inflammatory multisystem syndrome temporally associated with SARS-CoV-2                                 |
| <b>Onder G et al [193]</b>           | February 20, 2020                    | Italy                              | ND                  | Case-fatality rate and characteristics of patients dying in relation to COVID-19 in Italy                                                                        |
| <b>Shekerdeman LS et al [194]</b>    | March 14 - April 3, 2020             | North America, United states       | 48 Children         | Characteristics and Outcomes of Children with Coronavirus Disease 2019 (COVID-19) Infection Admitted to US and Canadian Pediatric Intensive Care Units           |
| <b>Zhou F et al [195]</b>            | December 29, 2019 - January 31, 2020 | China                              | 191 patients        | Clinical course and risk factors for mortality of adult inpatients with COVID-19 in Wuhan, China: a retrospective cohort study                                   |
| <b>Shi B et al [196]</b>             | February 3, 2020                     | China                              | 1 case              | Severe Pneumonia Due to SARS-CoV-2 and respiratory syncytial virus infection: a case report                                                                      |
| <b>Aleem A et al [197]</b>           | December 2021 - January 2022         | In the world                       | ND                  | Emerging Variants of SARS-CoV-2 And Novel Therapeutics Against Coronavirus (COVID-19).                                                                           |
| <b>Galloway SE et al [198]</b>       | December 29, 2020–January 12, 2021   | United states                      | ND                  | Emergence of SARSCoV-2 B.1.1.7 lineage                                                                                                                           |
| <b>Shiehzaidegan S et al [199]</b>   | Since July 2021                      | USA                                | ND                  | Analysis of the Delta Variant B.1.617.2 COVID-19                                                                                                                 |
| <b>Sanches PRS et al [200]</b>       | Sep 2021                             | UK, South Africa, Brazil and India | ND                  | Recent advances in SARS-CoV-2 Spike protein and RBD mutations comparison between new variants Alpha (B.1.1.7, United Kingdom)                                    |
| <b>He X et al [201]</b>              | October 2021                         | China                              | ND                  | The challenges of COVID-19 Delta variant:                                                                                                                        |

|                                                 |                                        |               |                                              |                                                                                                                                                                  |
|-------------------------------------------------|----------------------------------------|---------------|----------------------------------------------|------------------------------------------------------------------------------------------------------------------------------------------------------------------|
|                                                 |                                        |               |                                              | Prevention and vaccine development                                                                                                                               |
| <b>Hesman Saey. T, Garcia de Jesús. E [202]</b> | October-December, 2021                 | United states | ND                                           | Why the coronavirus's delta variant dominated 2021                                                                                                               |
| <b>He X et al [203]</b>                         | November 26, 2021                      | China         | ND                                           | SARS-CoV-2 Omicron variant: Characteristics and prevention                                                                                                       |
| <b>GISAID [204]</b>                             | December 7, 2021                       | Germany       | ND                                           | Variant : 21K (Omicron)                                                                                                                                          |
| <b>Sun Y et al [205]</b>                        | October 2020-November 2021             | China         | ND                                           | Origin and evolutionary analysis of the SARS-CoV-2 Omicron variant                                                                                               |
| <b>CDC [206]</b>                                | June 24, 2022                          | United states | Children aged under 17 years                 | COVID-19 Vaccine Recommendations for Children and Teens                                                                                                          |
| <b>Ladhani SN [207]</b>                         | December, 2021-May 2022-ferbruary 2022 | UK            | Children aged between 5 and 11 years old     | COVID-19 vaccination for children aged 5–11 years                                                                                                                |
| <b>CDC [208]</b>                                | July 14, 2022                          | United states | ND                                           | Pfizer-BioNTech COVID-19 Vaccine: Overview and Safety                                                                                                            |
| <b>WHO [209]</b>                                | 10 June 2022                           |               | ND                                           | The Pfizer BioNTech (BNT162b2) COVID-19 vaccine: What you need to know                                                                                           |
| <b>CDC [210]</b>                                | July 19, 2022                          | United states | Children aged: under 11 years<br>12-17 years | Stay Up to Date with Your COVID-19 Vaccines-Moderna                                                                                                              |
| <b>Quentin Nogues et al [211]</b>               | 28 juillet 2021                        | France        | Children aged 12-17 years old                | Covid-19 : le vaccin Spikevax® de Moderna peut être utilisé à partir de l'âge de 12 ans                                                                          |
| <b>Ian Smith [212]</b>                          | May 2021-February 2022                 |               | Children aged 5-17 years                     | COVID vaccines: Which countries are vaccinating children over 5 and how do they compare?                                                                         |
| <b>Woodworth KR et al [213]</b>                 | November 5, 2021                       | United states | Children aged between 5 and 11 years         | The Advisory Committee on Immunization Practices' Interim Recommendation for Use of Pfizer-BioNTech COVID-19 Vaccine in Children Aged 5–11 Years — United States |
| <b>Dorabawila V et al [214]</b>                 | December 13, 2021 - January 30, 2022   | United state  | 852,384 vaccinated children 12-17 years      | Effectiveness of the BNT162b2 vaccine among children 5-11 and 12-17 years in New York after the Emergence of the Omicron Variant                                 |
| <b>Sacco C et al [215]</b>                      | Jan 17 - April 13, 2022                | Italy         | 1063035 vaccinated children aged 5-11        | Effectiveness of BNT162b2 vaccine against SARS-CoV-2 infection and severe                                                                                        |



|                                                    |                              |                                                                                                                                  |                              |                                                                                                                                                                                                             |
|----------------------------------------------------|------------------------------|----------------------------------------------------------------------------------------------------------------------------------|------------------------------|-------------------------------------------------------------------------------------------------------------------------------------------------------------------------------------------------------------|
|                                                    |                              |                                                                                                                                  |                              | COVID-19 in children aged 5–11 years in Italy                                                                                                                                                               |
| <b>Zimmermann P et al [216]</b>                    | 2021                         | Australia                                                                                                                        | Children under 12 years      | Should children be vaccinated against COVID-19?                                                                                                                                                             |
| <b>Allo Docteur+Eurs Africa [217]</b>              | December 14, 2021            | Tunis                                                                                                                            | Children aged 5-11 years     | La Tunisie autorise le vaccin anti-Covid de Pfizer pour les enfants de 5 à 11 ans                                                                                                                           |
| <b>Thompson LA and Rasmussen SA [218]</b>          | June 4, 2021                 | Florida, United States                                                                                                           | ND                           | Children and COVID-19 Vaccines                                                                                                                                                                              |
| <b>Zou X et al [219]</b>                           | Since May, 2021              | United states                                                                                                                    | Children aged under 12 years | COVID-19 vaccines for children younger than 12 years: are we ready?                                                                                                                                         |
| <b>Léa MORILLON [220]</b>                          | April-June 2021              | France                                                                                                                           |                              | Covid-19. États-Unis, Allemagne, Israël... Ces pays où la vaccination des ados a déjà commencé                                                                                                              |
| <b>Ministry of Health and prevention [221]</b>     | May-November, 2021           | United Arab Emirates                                                                                                             |                              | COVID-19 vaccine for children                                                                                                                                                                               |
| <b>Mallapaty S et al [222]</b>                     | November, 2021               | United states, Europe, UK, United, Arab Emirates                                                                                 |                              | How COVID vaccines shaped 2021 in eight powerful charts                                                                                                                                                     |
| <b>MEED Middle East busniss intelligence [223]</b> | March 2021-April 2022        | Middle East and North Africa                                                                                                     |                              | Latest on the region's Covid-19 recovery                                                                                                                                                                    |
| <b>Cassandra Willyard [224]</b>                    | June 2022                    | United states                                                                                                                    | Children aged under 5 years  | FDA authorizes COVID vaccines for the littlest kids: what the data say                                                                                                                                      |
| <b>Khatatbeh M [225]</b>                           | 15-November-13-December 2021 | eight countries, namely, Iraq, Jordan, Kuwait, Lebanon, Palestine, Qatar, Saudi Arabia (KSA), and the United Arab Emirates (UAE) | Children aged under 18 years | Children's rates of COVID-19 vaccination as reported by parents, vaccine hesitancy, and determinants of COVID-19 vaccine uptake among children: a multi-country study from the Eastern Mediterranean Region |
| <b>Sam-Agudu NA et al [226]</b>                    | December 2021                | Africa countries                                                                                                                 | Children aged under 18 years | Children and adolescents in African countries should also be vaccinated for COVID-19                                                                                                                        |
| <b>Gerber JS [227]</b>                             | November 2021                | United states                                                                                                                    | Children aged above 5 years  | COVID-19 vaccines for children                                                                                                                                                                              |
| <b>Hause AM et al [228]</b>                        | November 3–December 19, 2021 | United states                                                                                                                    | Children aged above 5 years  | Safety of COVID-19 Vaccination in United States Children Ages 5 to 11 Years.                                                                                                                                |

---

|                               |                   |               |                              |                                                                              |
|-------------------------------|-------------------|---------------|------------------------------|------------------------------------------------------------------------------|
| <b>Kamidani S et al [229]</b> | February 2021     | United states | Children of all ages         | COVID-19 vaccine development: a pediatric perspective                        |
| <b>Walter EB et al [230]</b>  | September 6, 2021 | UK            | Children aged under 12 years | Evaluation of the BNT162b2 Covid-19 Vaccine in Children 5 to 11 Years of Age |

---

ND: Not determined
